# Supplementary material for: Prevalence and diagnostic ability of β-zone parapapillary atrophy in open-angle glaucoma: a systematic review and meta-analysis
Source: PubMed Central journal article supplement (PMC8840052; doi:10.1186/s12886-022-02282-5), 2022-02-12

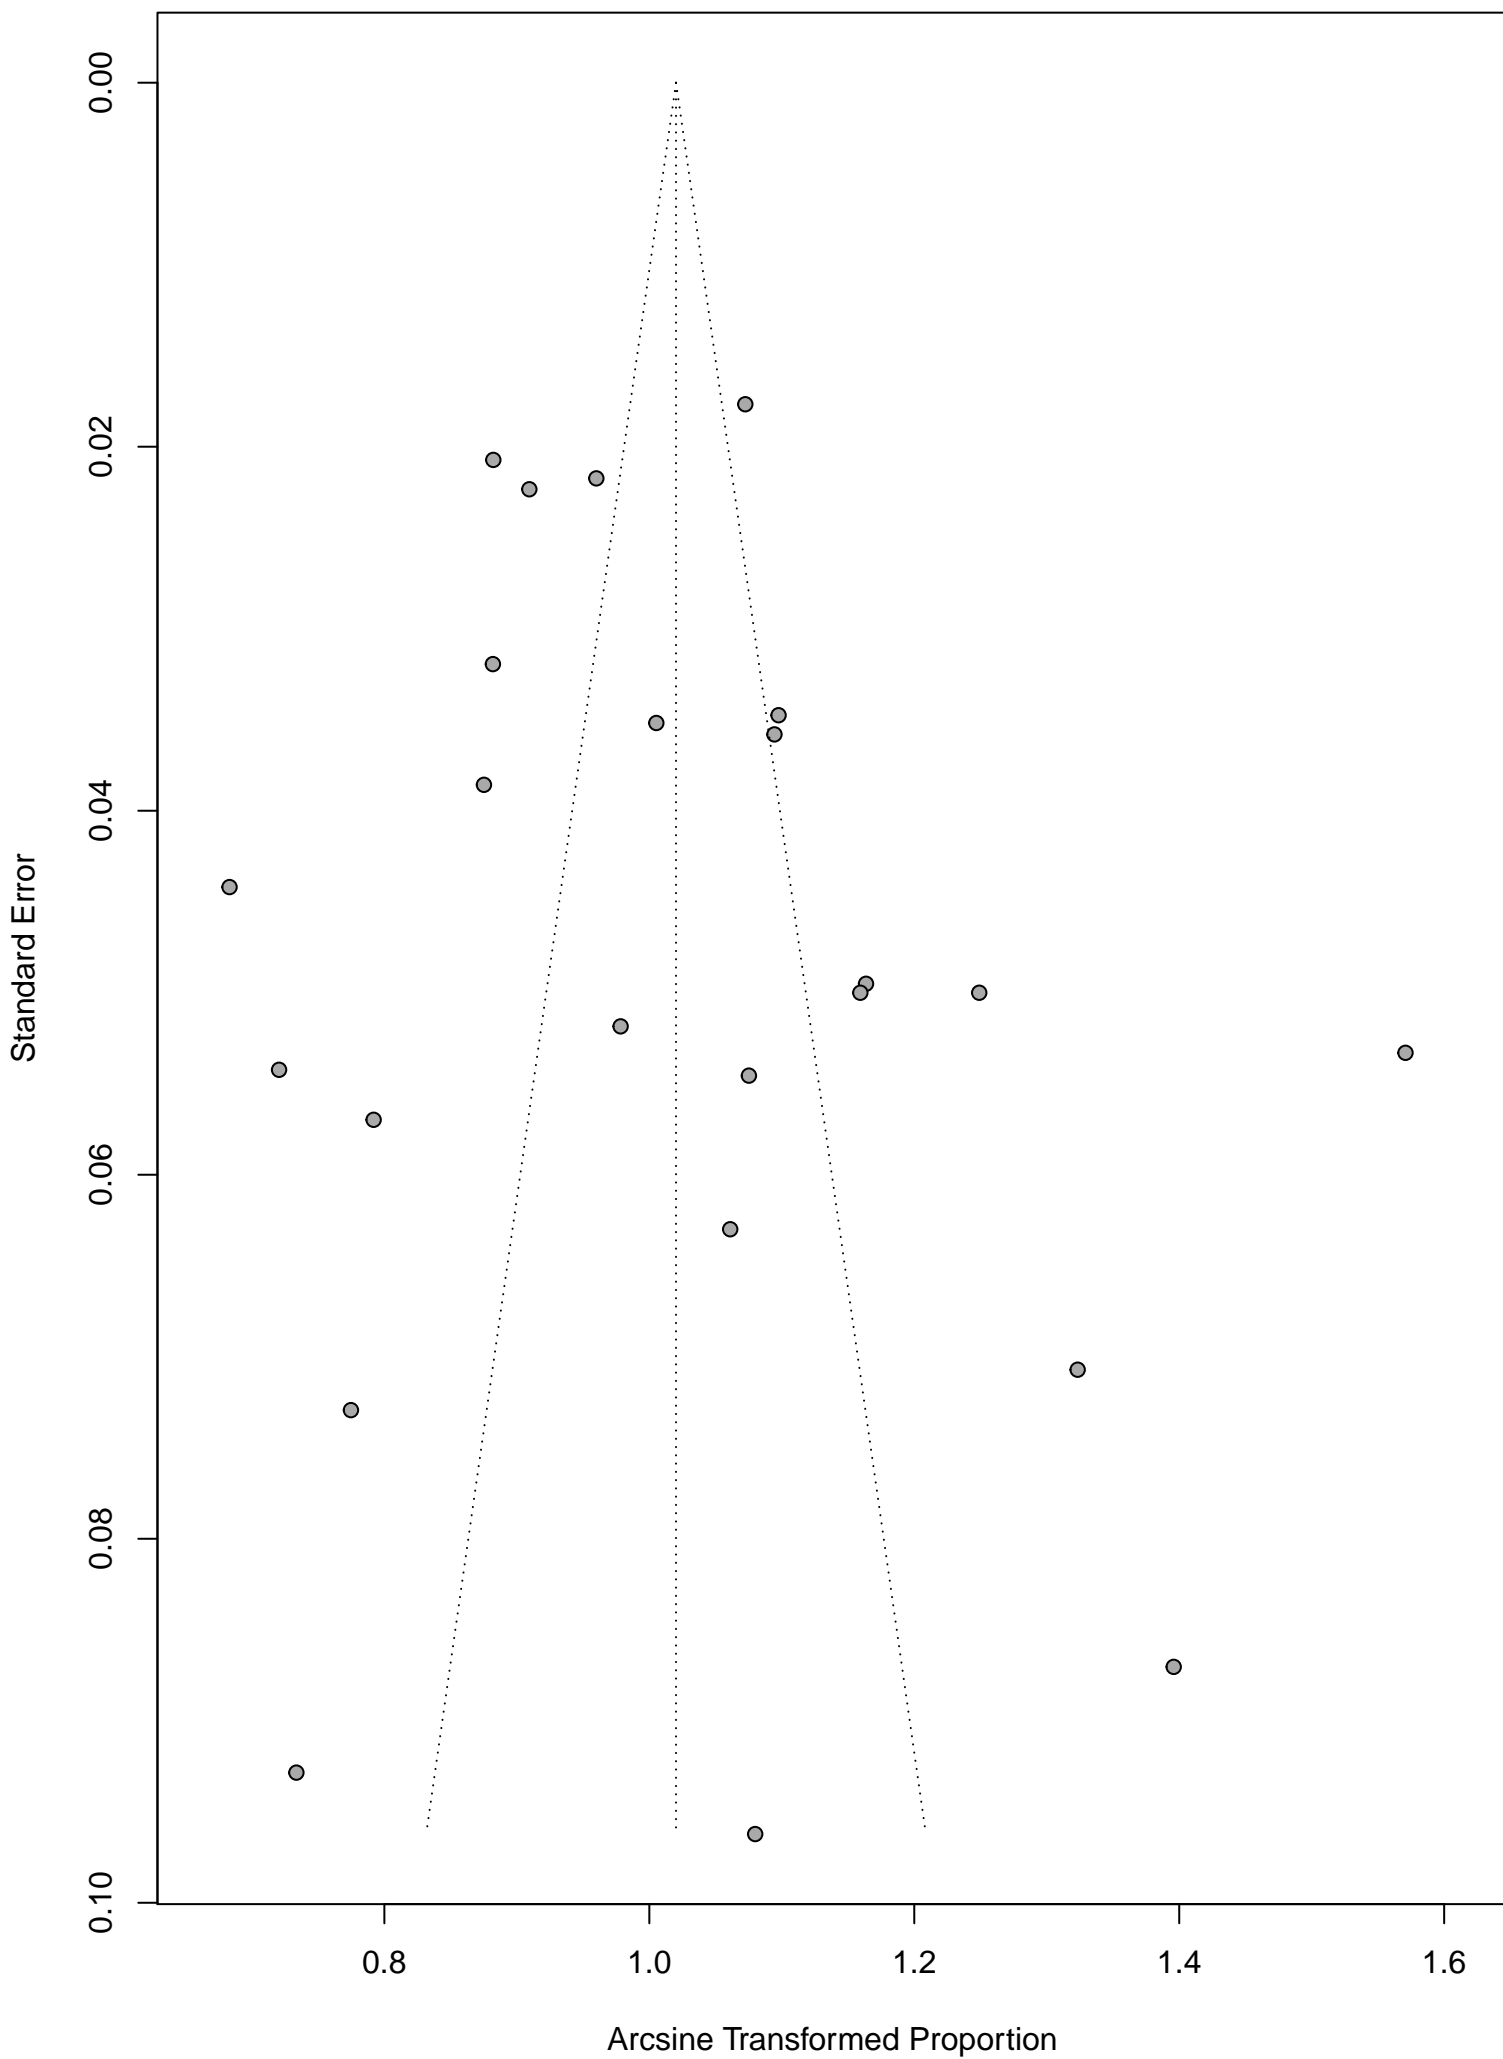

Supplement: 12886_2022_2282_MOESM3_ESM.pdf [file 12886_2022_2282_MOESM3_ESM.pdf]
